# Supplementary material for: Multiple Poses and Thermodynamics of Ligands Targeting Protein Surfaces: The Case of Furosemide Binding to mitoNEET in Aqueous Solution
Source: Frontiers journal article supplement (doi:10.3389/fcell.2022.886568), 2022-04-26
Supplement: Data_Sheet_1.pdf [file Data_Sheet_1.pdf]

## *Supplementary Material*

### **1 Supplementary Information**

#### **1.1 Localized Volume-Based Metadynamics Entropic Correction**

To remove the entropic contribution to binding free energy in LV-MetaD, it is necessary to apply a correction to the final free energy difference (Capelli et al., 2019). In particular, we have:

$$\begin{aligned}\Delta G^0 &= \Delta G_{MetaD} + \Delta G_{corr} \\ &= \Delta G_{MetaD} + RT \log\left(\frac{V^0}{V_{LV} - V_{prot}}\right)\end{aligned}$$

Where  $\Delta G_0$  is the standard binding free energy,  $\Delta G_{MetaD}$  is the free energy difference computed via LV-MetaD, and  $\Delta G_{corr}$  is the correction term. The latter is basically given by the concentration difference between the standard concentration ( $V^0$  is the standard volume,  $1660 \text{ \AA}^3$ ) and the volume accessible to the ligand in the localized volume ( $V_{LV}$  is the localized volume, and  $V_{prot}$  the portion of such volume occupied by the protein).

#### **1.2 Molecular Mechanics-Generalized Born Surface Area (MM-GBSA)**

Prior to the docking simulations, we retrieved the protein structure of mitoNEET (PDB: 6DE9) as a homodimer from the Protein Data Bank (Geldenhuis et al., 2019). We used the standard parameters for refinement implemented within the Protein Preparation Wizard (Schrödinger, 2019b). Furosemide was prepared using the ligprep utility program implemented in Schrödinger 2019-4 (Schrödinger, 2019a). The pH of  $7.0 \pm 2.0$  was chosen and the other standard parameters setting as default. We chose the centroid of the furosemide bound to mitoNEET as the centroid of the  $20 \times 20 \times 20 \text{ \AA}^3$  bounding box. according to (Bai et al., 2015). The van der Waals radius and charge scaling factors were set to 1.0 during grid generation. The docking was performed in Schrödingers' glide SP mode with at most 200 top-scoring binding modes were reserved for post docking minimization. (Halgren et al., 2004; Sastry et al., 2013) All settings were set to default, i.e. with the switches of the ligand flexible and the ring conformation sampling turning on, and the scaling factor of van der Walls radii as well as the partial charge cutoff for the ligand atoms setting as 0.8 and 0.15 respectively. We calculated the energies for the refined binding modes with the MM-GBSA calculation module in Maestro 2019-4 using the OPLS-2005 force field and the flexible distance set to  $20 \text{ \AA}$  (Shivakumar et al., 2010).

## 2 Supplementary Figures and Tables

### 2.1 Supplementary Figures

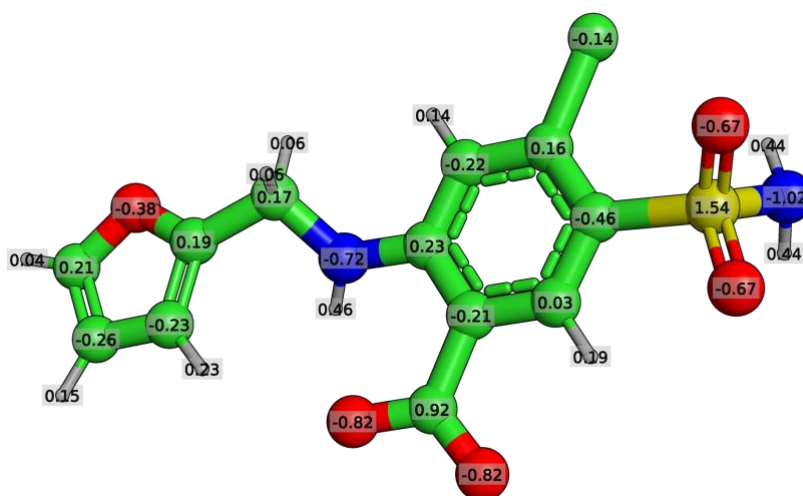

**Figure SI1.** The ligand was parametrized using the Generalized AMBER Force Field (GAFF) (Wang et al., 2004) obtaining the single-point charges using the semi-empirical AM1-BCC method.

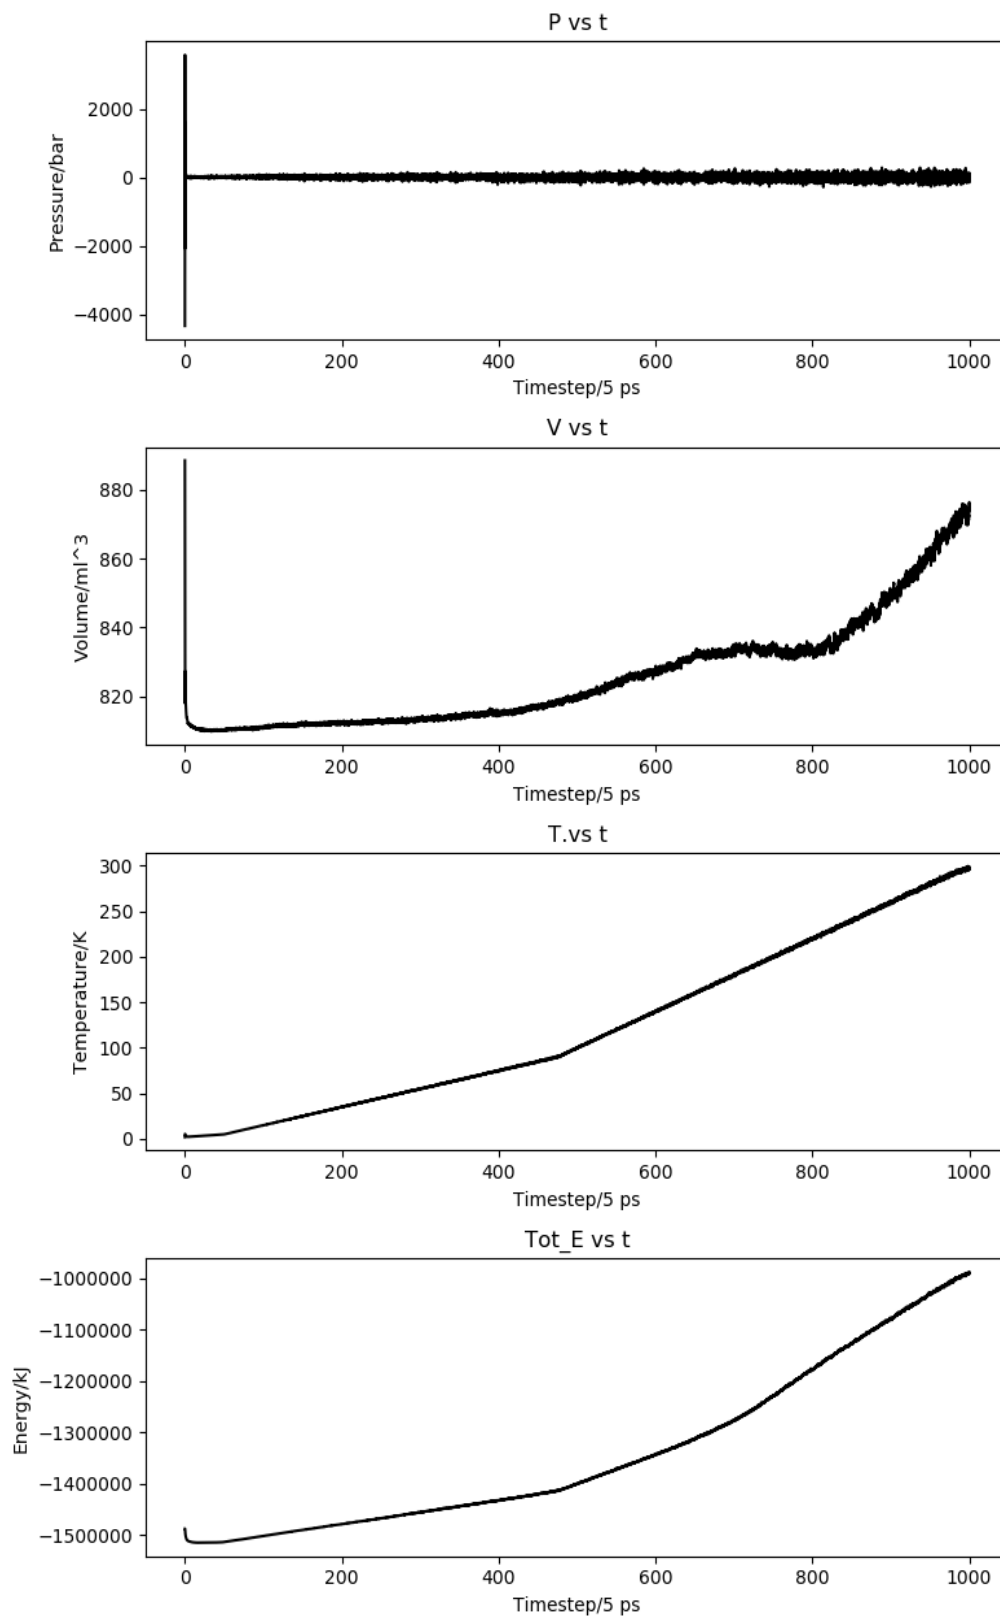

**Figure SI2.** Simulated annealing protocol. Line plots for pressure, volume, temperature and total energy while heating the system to 298 K in 1 ns are shown.

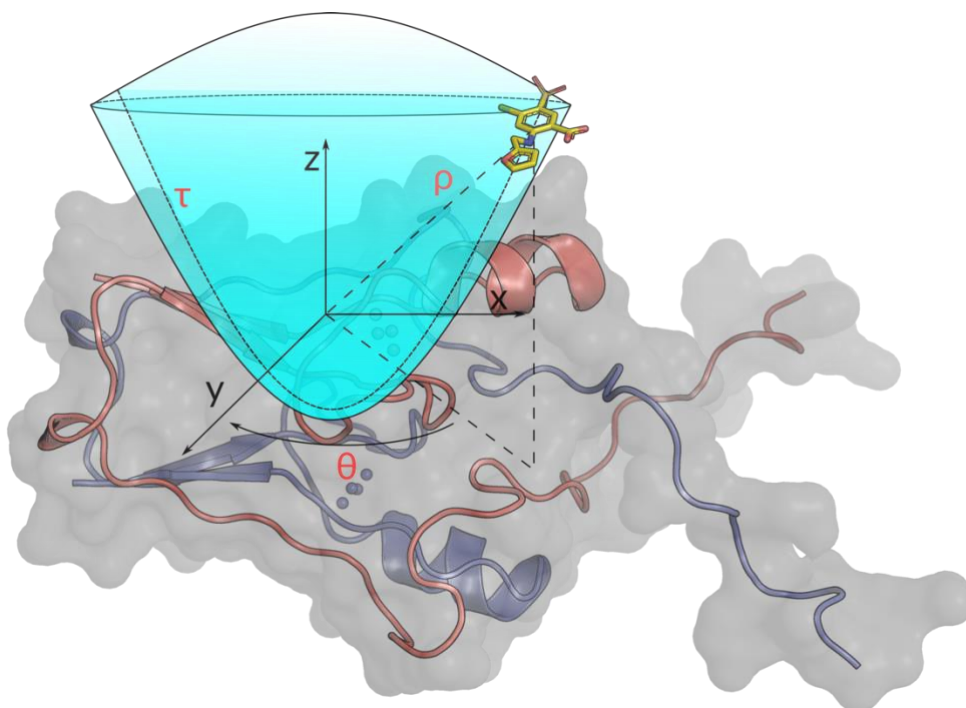

**Figure SI3.** Localized Volume-based Metadynamics CVs definition:  $\rho$ , defined as the distance between the center of mass of the ligand (ligand visualized with yellow sticks) and the protein (red and blue cartoon representation),  $\tau$ , the parameter that defines the parabolic-solid shape of the volume (Zhao et al., 2021),  $\theta$ , defined as the azimuthal angle of its orthogonal projection on the x-y plane.

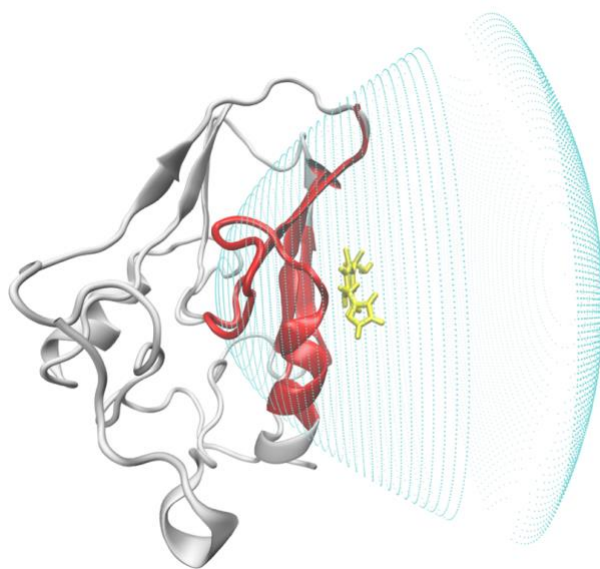

**Figure SI4.** The restraining volume which includes the binding pose observed in crystal structure (yellow) and the neighboring regions (red).

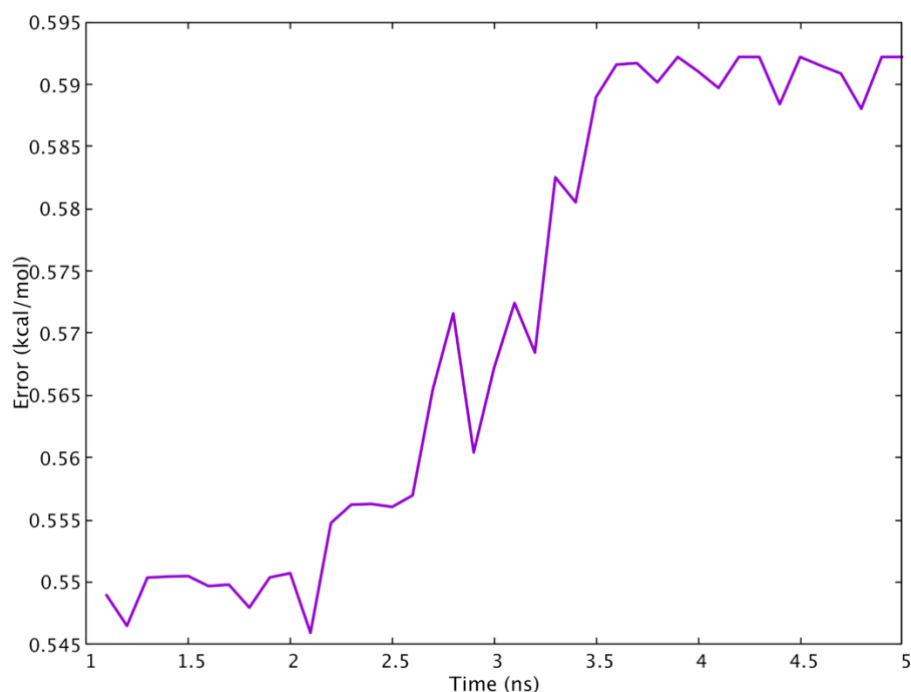

**Figure SI5.** Error calculation for the FES by means of block averaging. The error is represented as a function of the size of the blocks.

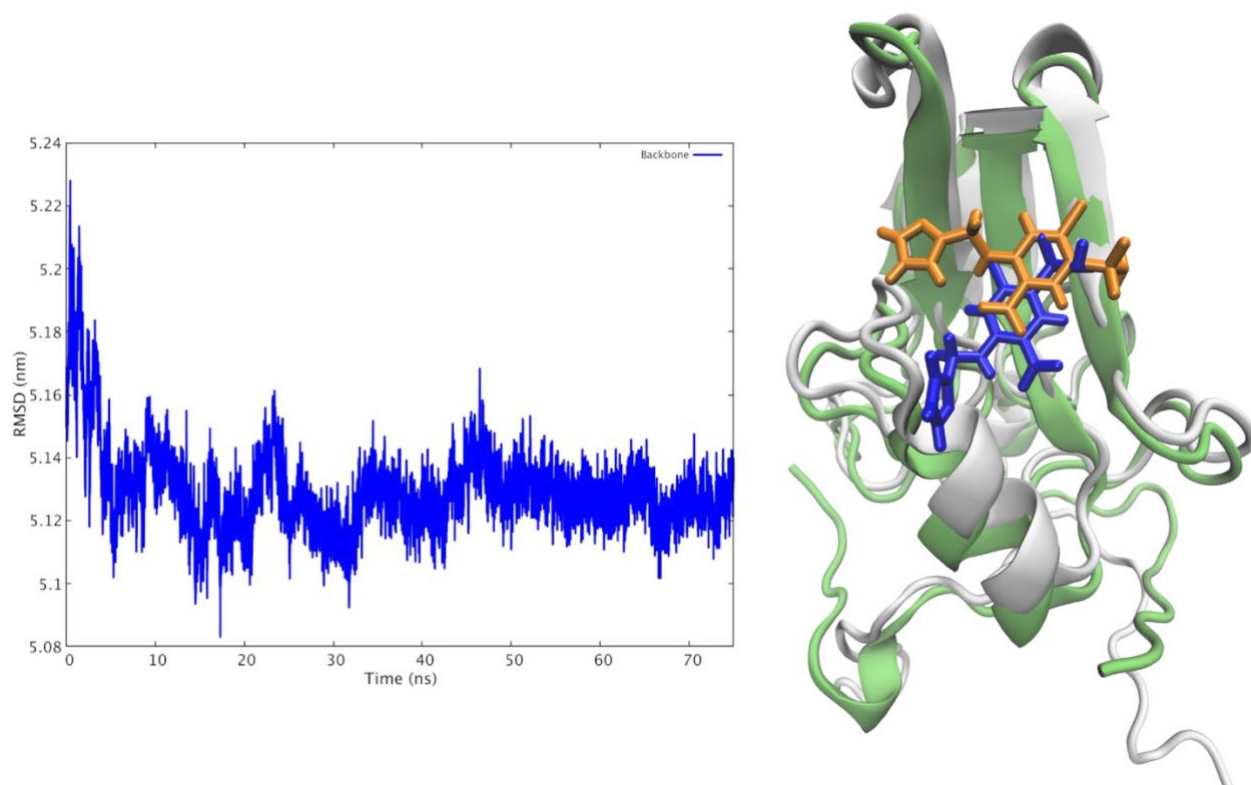

**Figure SI6.** Left: RMSD of protein backbone shows convergence after 75 ns of MD. Right: Comparison between the last MD snapshot and the X-ray structure (Last MD snapshot: protein in green, ligand in blue; X-ray structure: protein in white, ligand in orange).

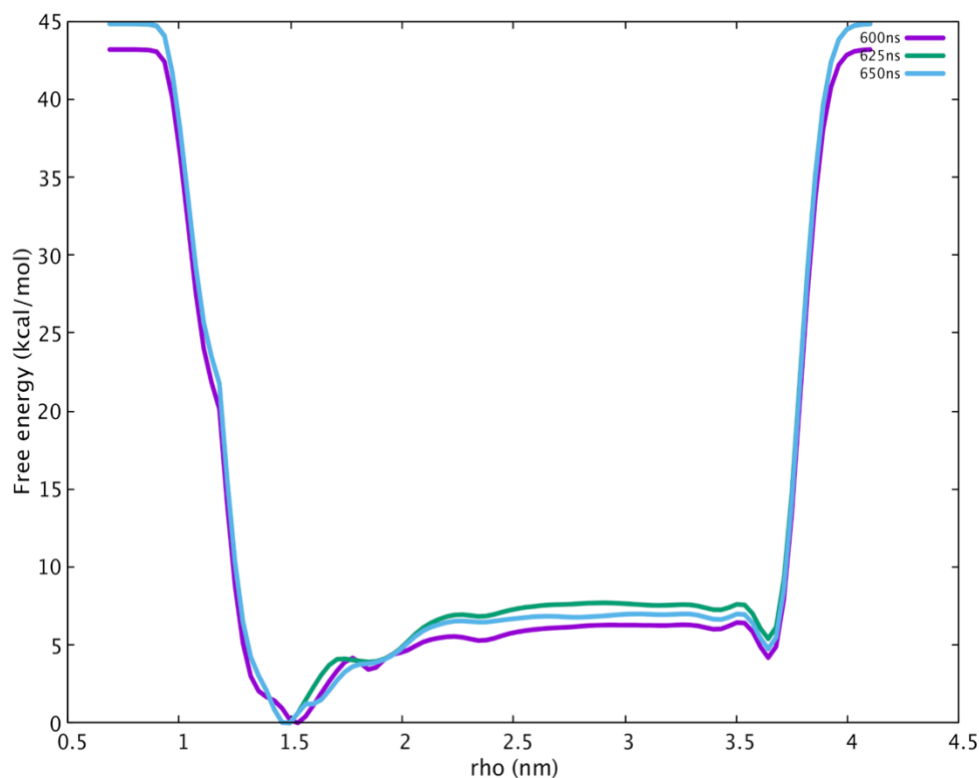

**Figure SI7.** Free energy surfaces are projected along the distance between the center of mass of the protein and the center of mass of the ligand at 600, 625 and 650 ns of simulation time. The position of the minima and the profile appear converged.

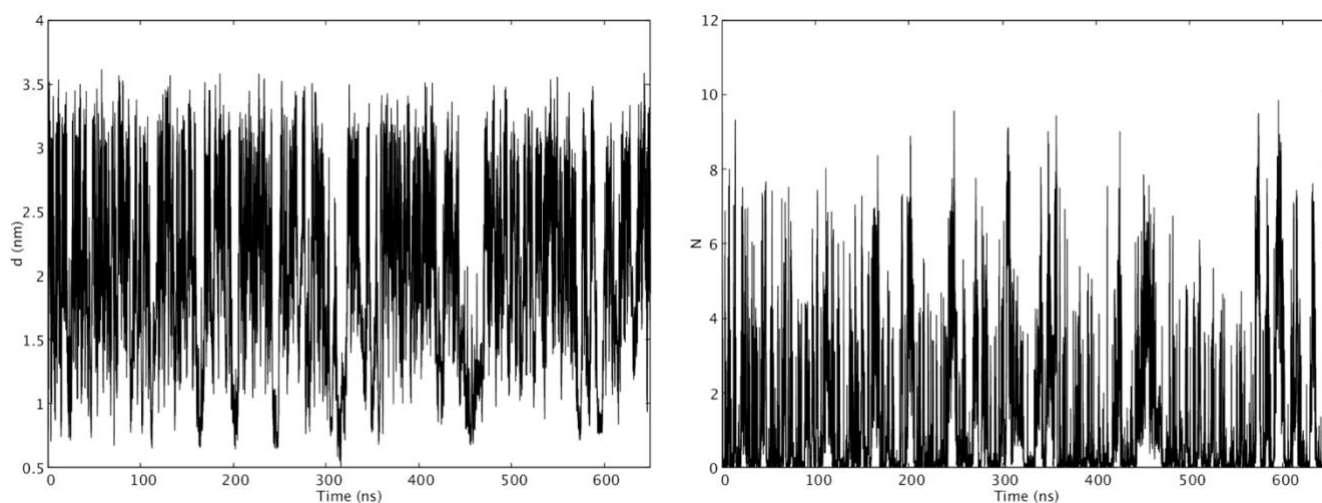

**Figure SI8.** Time series for the two CVs (distance from the cluster on the left and number of H-bonds/salt bridges between ligand and protein on the right) along which we projected the FES. We can observe a diffusive behavior in the CV space that corroborates the idea that the simulation converged.

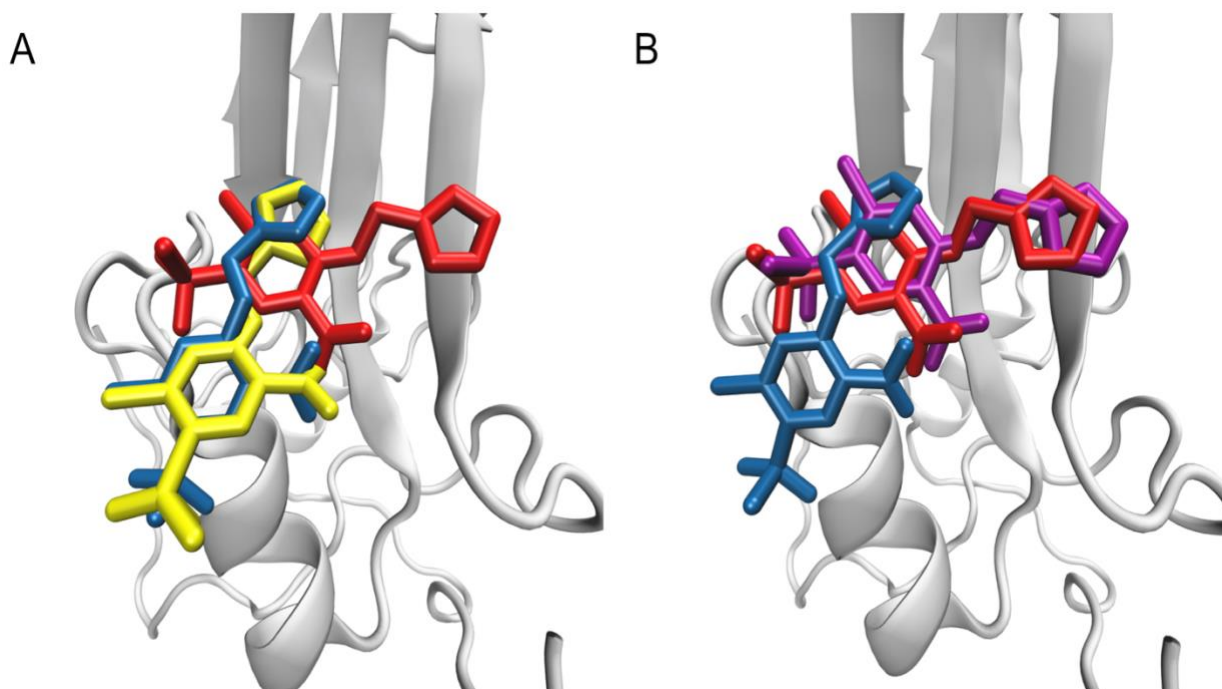

**Figure SI9.** The interconversion of pose Ib and Ic of basin I from unbiased MD simulations starting from each pose. **(A)** Pose **Ib** (in red), pose **Ic** (in blue) and a frame from MD of pose **Ib** that is similar to pose **Ic** (in yellow). **(B)** Pose **Ib** (in red), pose **Ic** (in blue) and a frame from MD of pose **Ic** that is similar to pose **Ib** (in purple).

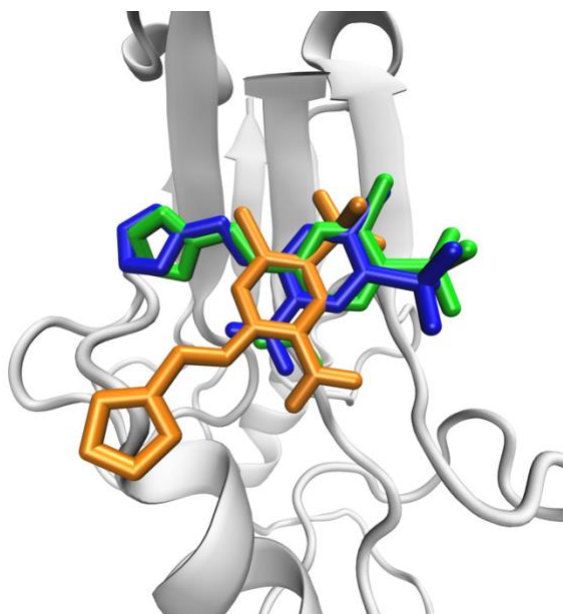

**Figure SI10.** Pose **Ia** (in orange), **crystallographic pose** (in blue) and a frame from MD of pose **Ia** that is similar to **crystallographic pose** (in green)



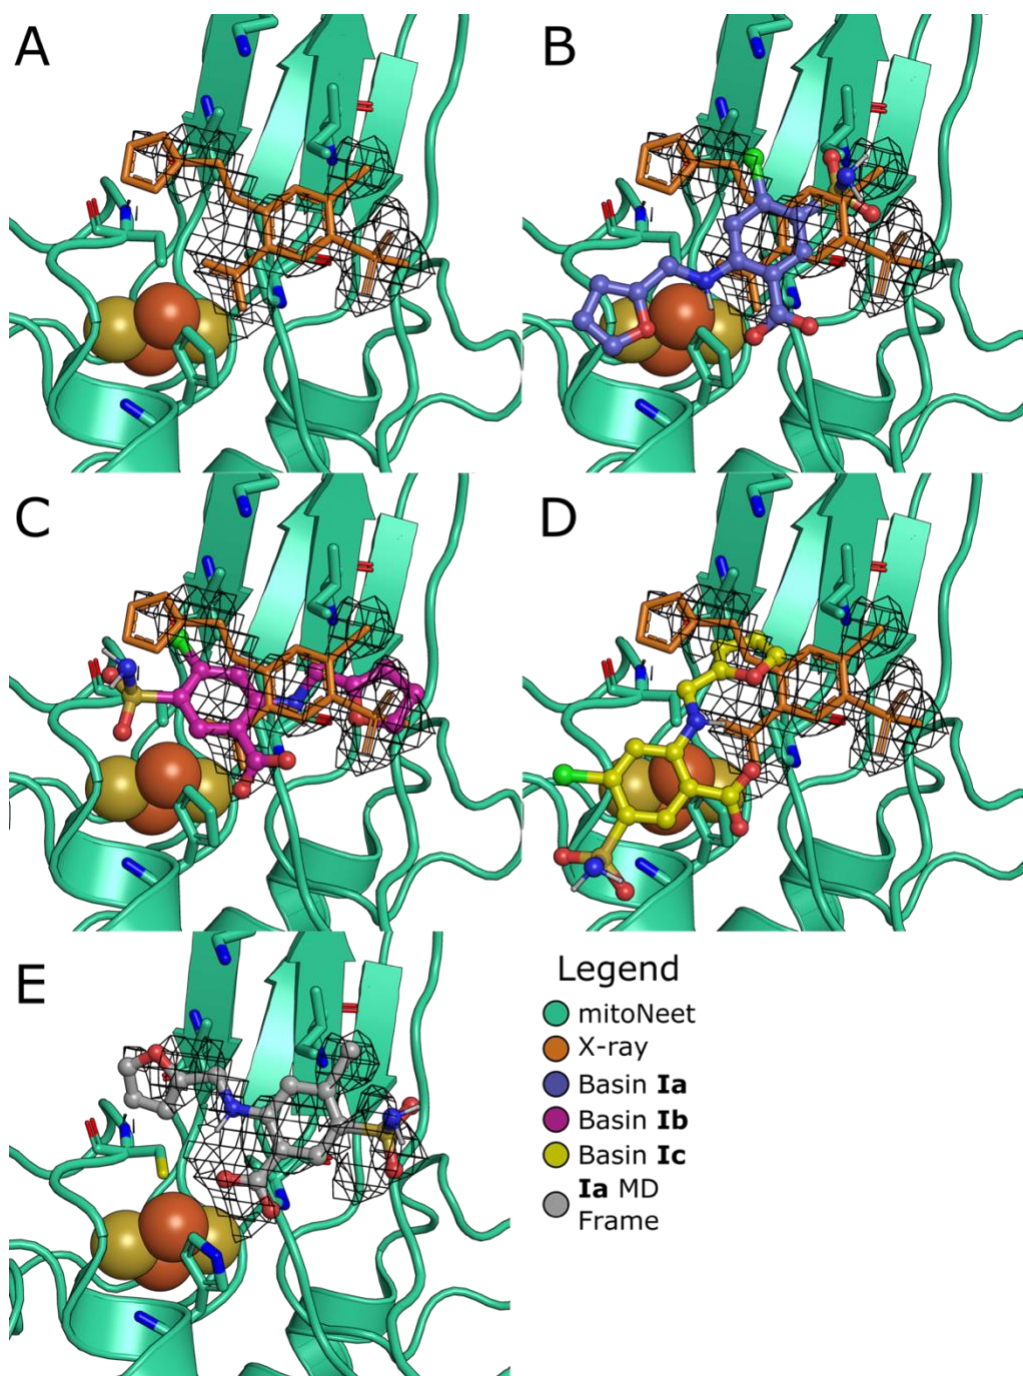

**Figure SI11.** Overlap of pose **Ia-c** (B-D) structures of furosemide (blue, magenta, yellow, shown as ball and sticks) with crystal structure of mitoNEET (A, green, comic, PDB ID 6DE9) and 2Fo-Fc map (contoured at  $0.8 \sigma$  as black wireframe, reported in [10.2210/pdb6de9/pdb](https://doi.org/10.2210/pdb6de9/pdb)) showing the experimentally-derived electron density of furosemide. The electronic density of the furan moiety is not resolved (Geldenhuys et al., 2019). (E) Comparison of furosemide's pose in the MD frame that best reproduces the X-ray structure (**Ia**, grey, ball and stick, see Text) with the 2Fo-Fc map. The figure shows that this binding pose reproduces also the experimental electronic density similarly to the pose of the X-ray structure.



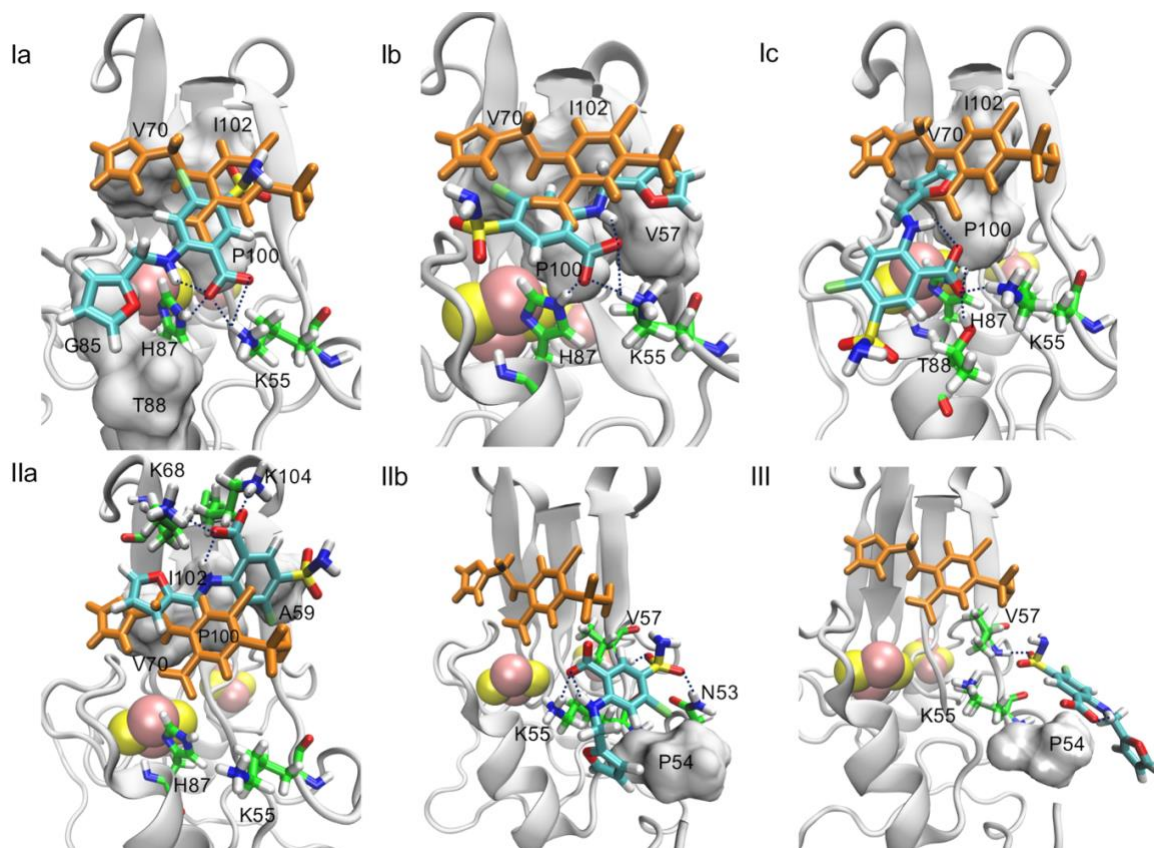

**Figure SI12.** Ia-c, IIa-b, III poses presented in Figure 2. H-bonds/salt bridges are drawn as dashed lines in the 3D structures. The X-ray pose with PDB ID 6DE9 (Geldenhuys et al., 2019) is added to each frame.

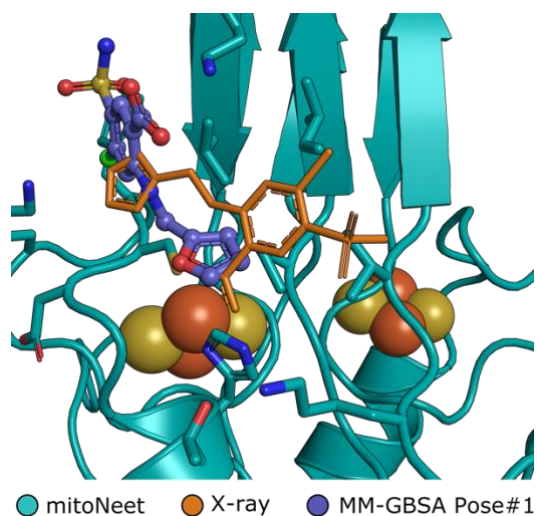

**Figure SI13.** The lowest energy MM-GBSA pose (purple ball and sticks, #1) as calculated with Schrödinger Suite (A). As all of the other top 10 poses, it differs largely from that in the X-ray structure (orange sticks, RMSD=8.9 Å) and calculated by metadynamics (RMSD ranges from 7.3 Å from **Ib**, to 9.4 Å from **Ic**, poses not shown). The pose which is similar to that in the X-ray pose, is ranked as #121.

## Metadynamics of mitoNEET: Supplementary Material

These results support the usefulness of going beyond simple (yet fast) docking approaches to study the binding of furosemide to mitoNEET.

### 2.2 Supplementary Tables

**Table SI1.** Energies calculated with the Schrödinger MM-GBSA suit (Shivakumar et al., 2010) (see Section 1.2 and Figure SI13). The binding energies - much larger (in absolute value) than the experimental (Geldenhuys et al., 2016) and calculated values of the binding free energies (this work) - are used here to rank the poses.

| Energies (kcal/mol)         | Highest Ranked Pose | Pose #121 (X-ray-like) |
|-----------------------------|---------------------|------------------------|
| Ligand Strain               | 1.9                 | 0.5                    |
| MMGBSA $\Delta G$ Bind      | -39.2               | -23.3                  |
| MMGBSA $\Delta G$ Bind (NS) | -37.2               | -22.7                  |

**Table SI2.** H-bonds/salt bridges and hydrophobic contact distances in **I-III**.

|         | Lig. - Atom | Prot.- Res. | Prot.- Atom | Distance (Å)            | Interaction           |
|---------|-------------|-------------|-------------|-------------------------|-----------------------|
| Pose Ia | O21         | LYS55       | NZ          | 2.9                     | Salt bridge           |
|         | O20         | LYS55       | NZ          | 2.9                     | Salt bridge           |
|         | O20         | HIS87       | NE2         | 2.8                     | H-bond                |
|         | O16         | LYS68       | NZ          | 3.0-2.8<br>(O16-OW-NZ)  | water mediated H-bond |
|         | C13         | PRO100      | CG          | 4.4                     | Hydrophobic           |
|         | C10         | PRO100      | CG          | 4.2                     | Hydrophobic           |
|         | C3          | GLY85       | CA          | 3.3                     | Hydrophobic           |
|         | C1          | THR88       | CG2         | 3.7                     | Hydrophobic           |
|         | C12         | VAL70       | CG1         | 5.1                     | Hydrophobic           |
|         | C11         | ILE102      | CD          | 4.7                     | Hydrophobic           |
| Pose Ib | O20         | LYS55       | NZ          | 2.9                     | Salt bridge           |
|         | O21         | LYS55       | NZ          | 2.9                     | Salt bridge           |
|         | O20         | HIS87       | NE2         | 2.9                     | H-bond                |
|         | O18         | C83         | O           | 2.7-2.8<br>(O18-OW-O)   | water mediated H-bond |
|         | O20         | T88         | OG1         | 2.7-2.6<br>(O20-OW-OG1) | water mediated H-bond |

# Metadynamics of mitoNEET: Supplementary Material

|          |        |        |       |                         |                       |
|----------|--------|--------|-------|-------------------------|-----------------------|
|          | C1     | VAL57  | CG2   | 3.6                     | Hydrophobic           |
|          | C2     | VAL57  | CG2   | 4.0                     | Hydrophobic           |
|          | C3     | VAL57  | CG1   | 3.6                     | Hydrophobic           |
|          | C3     | ILE102 | CD    | 4.2                     | Hydrophobic           |
|          | C6     | ILE102 | CD    | 4.1                     | Hydrophobic           |
|          | C13    | PRO100 | CG    | 4.1                     | Hydrophobic           |
|          | C13    | VAL70  | CG1   | 4.4                     | Hydrophobic           |
|          | C8-C13 | H87    | CG-ND | 5.2                     | $\pi$ - $\pi$ -Stack. |
| Pose Ic  | O20    | LYS55  | NZ    | 2.8                     | Salt bridge           |
|          | O20    | HIS87  | NE2   | 3.3                     | H-bond                |
|          | O20    | THR88  | OG1   | 2.5                     | H-bond                |
|          | C1     | PRO100 | CG    | 4.4                     | Hydrophobic           |
|          | C1     | ILE102 | CD    | 4.4                     | Hydrophobic           |
|          | C2     | PRO100 | CG    | 4.4                     | Hydrophobic           |
|          | C2     | ILE102 | CD    | 4.2                     | Hydrophobic           |
|          | C2     | VAL70  | CG1   | 3.5                     | Hydrophobic           |
|          | C2     | VAL70  | CG2   | 4.1                     | Hydrophobic           |
|          | C3     | VAL70  | CG1   | 3.7                     | Hydrophobic           |
|          | C3     | VAL70  | CG2   | 4.4                     | Hydrophobic           |
|          | C8-C13 | H87    | CG-ND | 5.3                     | $\pi$ - $\pi$ -Stack. |
| Pose IIa | O20    | LYS68  | NZ    | 2.8                     | Salt bridge           |
|          | O21    | LYS104 | NZ    | 2.9                     | Salt bridge           |
|          | C13    | ILE102 | CG1   | 3.8                     | Hydrophobic           |
|          | C6     | ILE102 | CG1   | 4.0                     | Hydrophobic           |
|          | C11    | ALA59  | CB    | 3.8                     | Hydrophobic           |
|          | C12    | ALA59  | CB    | 4.0                     | Hydrophobic           |
|          | C6     | VAL70  | CG2   | 4.1                     | Hydrophobic           |
|          | C3     | VAL70  | CG2   | 3.6                     | Hydrophobic           |
|          | C2     | VAL70  | CG2   | 3.9                     | Hydrophobic           |
|          | C1     | VAL70  | CG2   | 3.8                     | Hydrophobic           |
| Pose IIb | O20    | LYS55  | NZ    | 2.7                     | Salt bridge           |
|          | O16    | VAL57  | N     | 3.2                     | H-bond                |
|          | O18    | ASN53  | ND2   | 3.0                     | H-bond                |
|          | O16    | ASN53  | OD1   | 2.7-2.8<br>(O16-OW-OD1) | water mediated H-bond |
|          | C2     | PRO54  | CB    | 3.5                     | Hydrophobic           |
|          | C3     | PRO54  | CB    | 4.0                     | Hydrophobic           |
|          | C10    | VAL57  | CB    | 4.3                     | Hydrophobic           |
|          | C10    | VAL57  | CG2   | 3.6                     | Hydrophobic           |

## Metadynamics of mitoNEET: Supplementary Material

|          |     |       |    |                        |                       |
|----------|-----|-------|----|------------------------|-----------------------|
| Pose III | O18 | VAL57 | N  | 2.9                    | H-bond                |
|          | O18 | VAL57 | O  | 2.7<br>(O18-OW-O)      | water mediated H-bond |
|          | N17 | VAL57 | O  | 3.2-2.8<br>(N17-OW-O)  | water mediated H-bond |
|          | O16 | LYS55 | NZ | 3.1-3.0<br>(O16-OW-NZ) | water mediated H-bond |
|          | C3  | PRO54 | CD | 4.2                    | Hydrophobic           |
|          | C6  | PRO54 | CD | 3.5                    | Hydrophobic           |
|          | C6  | PRO54 | CG | 4.4                    | Hydrophobic           |
|          | C10 | PRO54 | CD | 4.4                    | Hydrophobic           |
|          | C13 | PRO54 | CD | 4.0                    | Hydrophobic           |

**Table SI3.** Free binding energy calculated from LV-MetaD simulation ( $\Delta G^0$  is the standard binding free energy,  $\Delta G_{\text{MetaD}}$  is the free energy difference computed via LV-MetaD, and  $\Delta G_{\text{corr}}$  is the correction term) and emerging from affinity measurements in vitro ( $\Delta G_{\text{exp}}$ ).

| $\Delta G_{\text{MetaD}}$<br>(kcal/mol) | $\Delta G_{\text{corr}}$<br>(kcal/mol) | $\Delta G^0$<br>(kcal/mol) | $\Delta G_{\text{exp}}$<br>(kcal/mol)<br>(Geldenhuys et al., 2016) |
|-----------------------------------------|----------------------------------------|----------------------------|--------------------------------------------------------------------|
| 5.9±0.8                                 | 1.8                                    | 7.7±0.8                    | 5.8                                                                |

### 3 References

- Bai, F., Morcos, F., Sohn, Y.-S., Darash-Yahana, M., Rezende, C.O., Lipper, C.H., et al. (2015). The Fe-S cluster-containing NEET proteins mitoNEET and NAF-1 as chemotherapeutic targets in breast cancer. *Proc. Natl. Acad. Sci. U.S.A.* 112(12), 3698-3703. doi: 10.1073/pnas.1502960112.
- Capelli, R., Carloni, P., and Parrinello, M. (2019). Exhaustive Search of Ligand Binding Pathways via Volume-Based Metadynamics. *J. Phys. Chem. Lett.* 10(12), 3495-3499. doi: 10.1021/acs.jpcllett.9b01183.
- Geldenhuys, W.J., Long, T.E., Saralkar, P., Iwasaki, T., Nuñez, R.A.A., Nair, R.R., et al. (2019). Crystal structure of the mitochondrial protein mitoNEET bound to a benze-sulfonide ligand. *Commun. Chem.* 2. doi: 10.1038/s42004-019-0172-x.

- Geldenhuys, W.J., Yonutas, H.M., Morris, D.L., Sullivan, P.G., Darvesh, A.S., and Leeper, T.C. (2016). Identification of small molecules that bind to the mitochondrial protein mitoNEET. *Bioorg. Med. Chem. Lett.* 26(21), 5350-5353. doi: 10.1016/j.bmcl.2016.09.009.
- Halgren, T.A., Murphy, R.B., Friesner, R.A., Beard, H.S., Frye, L.L., Pollard, W.T., et al. (2004). Glide: a new approach for rapid, accurate docking and scoring. 2. Enrichment factors in database screening. *Journal of Medicinal Chemistry* 47(7), 1750-1759. doi: papers3://publication/doi/10.1021/jm030644s.
- Sastry, G.M., Adzhigirey, M., Day, T., Annabhimoju, R., and Sherman, W. (2013). Protein and ligand preparation: parameters, protocols, and influence on virtual screening enrichments. *Journal of Computer-Aided Molecular Design* 27(3), 221-234. doi: papers3://publication/doi/10.1007/s10822-013-9644-8.
- Schrödinger, L.L.C. (2019a). "Schrödinger Release 2019-4: LigPrep". (New York, NY: Schrödinger, LLC).
- Schrödinger, L.L.C. (2019b). "Schrödinger Release 2019-4: Protein Preparation Wizard". (New York: Schrödinger).
- Shivakumar, D., Williams, J., Wu, Y., Damm, W., Shelley, J., and Sherman, W. (2010). Prediction of Absolute Solvation Free Energies using Molecular Dynamics Free Energy Perturbation and the OPLS Force Field. *Journal of Chemical Theory and Computation* 6(5), 1509-1519. doi: 10.1021/ct900587b.
- Wang, J., Wolf, R.M., Caldwell, J.W., Kollman, P.A., and Case, D.A. (2004). Development and testing of a general amber force field. *J. Comput. Chem.* 25(9), 1157-1174. doi: 10.1002/jcc.20035.
- Zhao, Q., Capelli, R., Carloni, P., Lüscher, B., Li, J., and Rossetti, G. (2021). Enhanced Sampling Approach to the Induced-Fit Docking Problem in Protein–Ligand Binding: The Case of Mono-ADP-Ribosylation Hydrolase Inhibitors. *J. Chem. Theory Comput.* 17(12), 7899-7911. doi: 10.1021/acs.jctc.1c00649.
